# Supplementary material for: Economically viable sensitive and selective luminescent sensor for the determination of Au(iii) in environmental samples
Source: Royal Society of Chemistry journal article supplement (doi:10.1039/c4ra05217j), 2014-01-01

[Supporting information](#)

**Economically viable sensitive and selective luminescent sensor  
for the determination of Au(III) in environmental samples**

**N. Vasimalai, K. Rajalakshmi and S. Abraham John\***

*Centre for Nanoscience and Nanotechnology  
Department of Chemistry, Gandhigram Rural Institute  
Gandhigram – 624 302, Dindigul, Tamilnadu, India.  
E-mail: [abrajohn@yahoo.co.in](mailto:abrajohn@yahoo.co.in)*

**Fig. S1.** Effect of (A) DMT (B) AMT and (C) MMT concentrations on the fluorescence intensity in the presence of 8 nM Au(III).

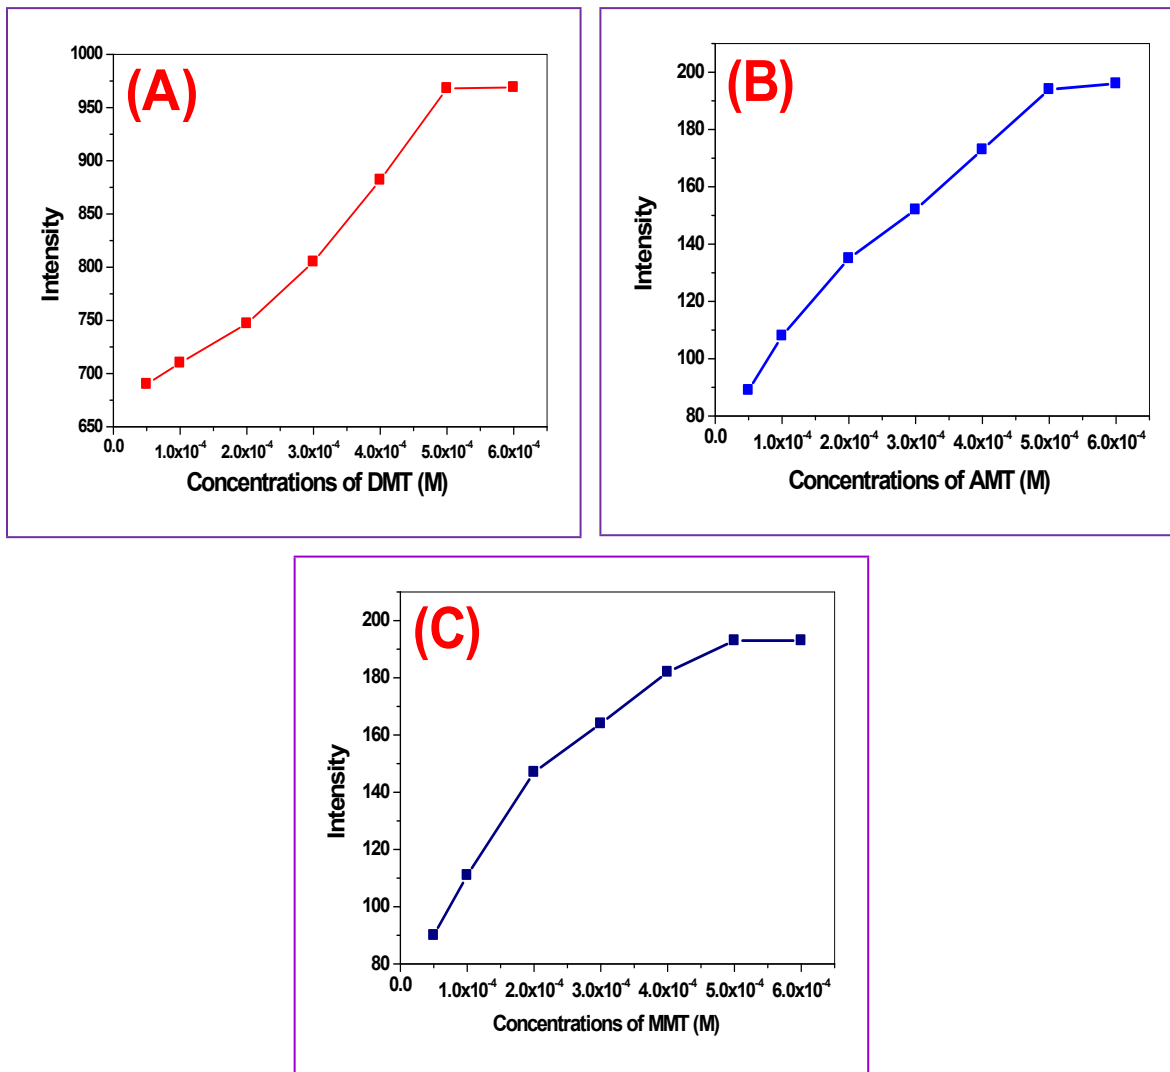

**Fig. S2.** Effect of pH on the fluorescence intensity of 0.5 mM of (A) DMT, (B) AMT and (C) MMT in the presence of 8 nM Au(III).

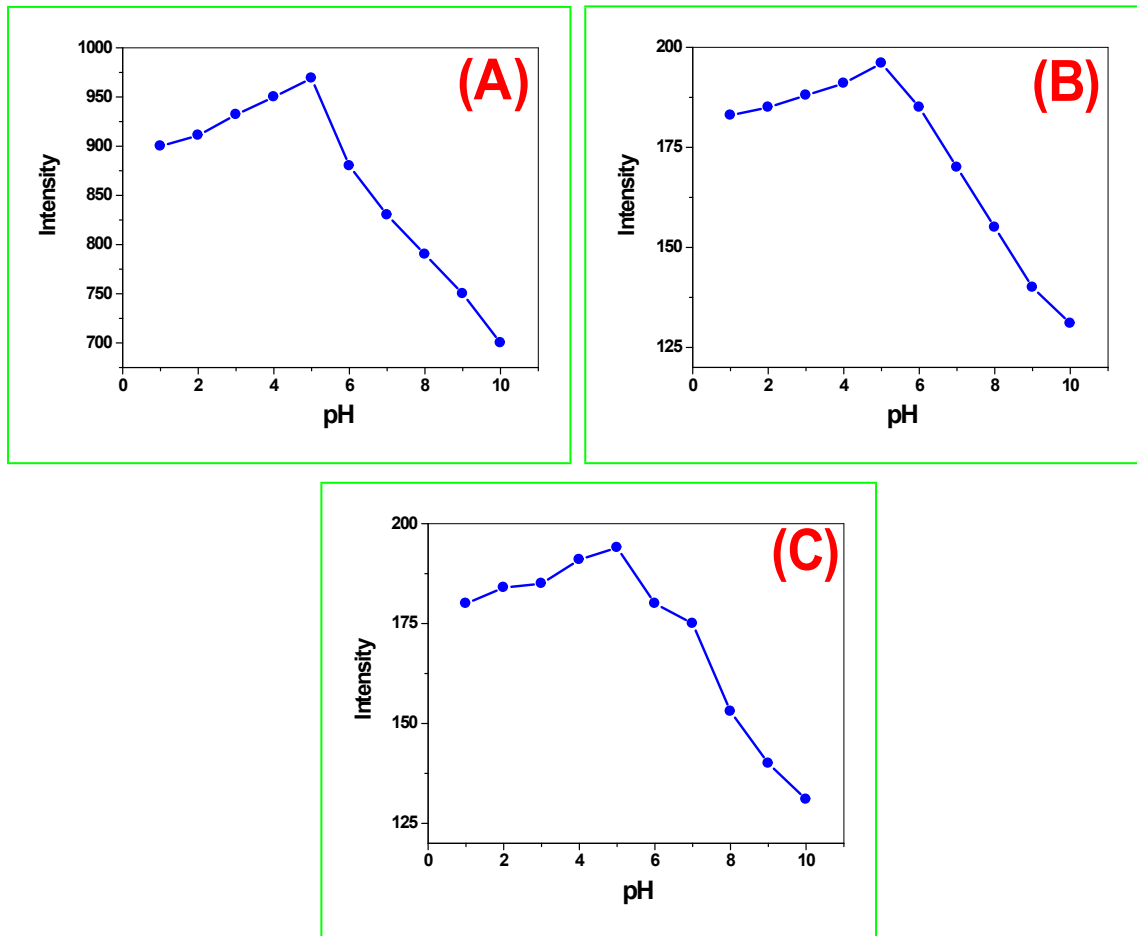

**Fig. S3.** Job's plot of (A) DMT, (B) AMT and (C) MMT with Au(III) in water (pH: 5.0). The total concentrations of ligands and Au(III) was 10  $\mu$ M. The molar fraction was given by  $[\text{Au}^{3+}]/([\text{Au}^{3+}]+[\text{ligand}])$ .

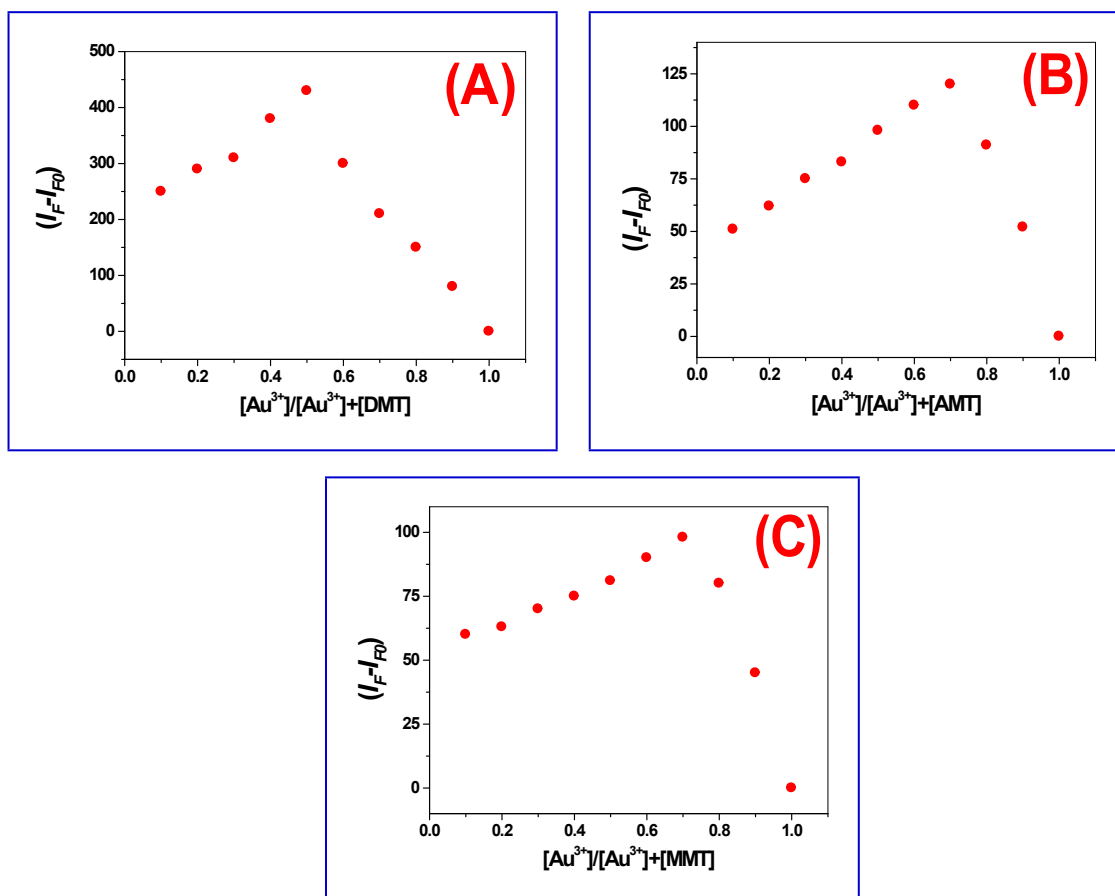

Scheme S1. Possible binding sites of DMT, AMT and MMT ligands with Au(III).

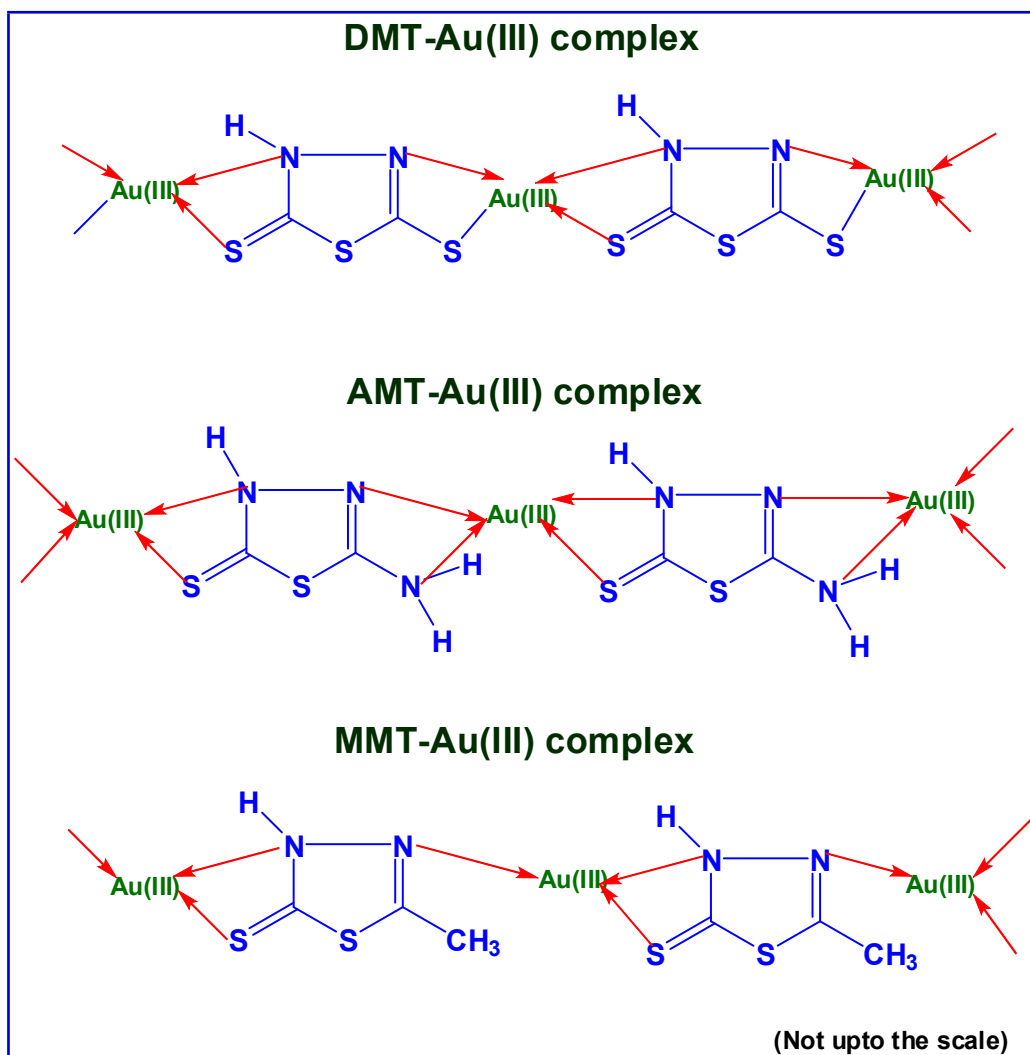

**Fig. S4.** Emission spectra of 0.5 mM DMT in the presence of different concentrations of Au(III): (A): (a)-(z) each increment 100 pM of Au(III) and (B): (a)-(z) each increment 10 pM of Au(III) ( $\lambda_{\text{ex}}/\lambda_{\text{em}}$ : 330/435 nm).

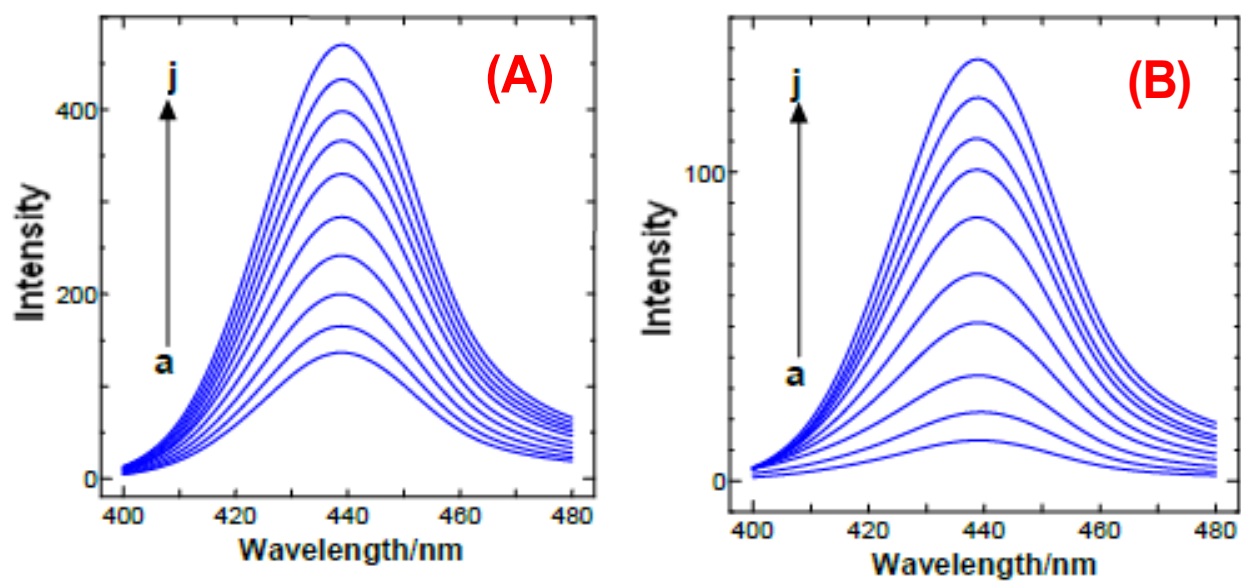

Supplement: c4ra05217j1.pdf [file c4ra05217j1.pdf]
